# Supplementary material for: Value of Perioperative Chest X-ray for the Prediction of Sternal Wound Complications after Cardiac Surgery in High-Risk Patients: A “Work in Progress” Analysis
Source: MDPI journal article supplement (doi:10.3390/jcm10020207), 2021-01-08
Supplement: s1 [file s1]

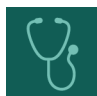

**Table supplement.** Univariate analysis of additional radiological measurements between patients developing or not SD and MG1-SSI.

| Variable                         | SD<br>(75 patients) | No SD<br>(774 patients) | <i>p</i> | MG1-SSI<br>(58 patients) | No MG1-SSI<br>(791 patients) | <i>p</i> |
|----------------------------------|---------------------|-------------------------|----------|--------------------------|------------------------------|----------|
| pre-2LISH (mm)                   | 19.8±3.9            | 18.5±4.5                | 0.026    | 20.0±5.3                 | 18.6±4.5                     | 0.020    |
| pre-3LISH (mm)                   | 18.9±3.9            | 18.7±3.7                | 0.572    | 18.8±3.9                 | 18.7±3.7                     | 0.852    |
| pre-4LISH (mm)                   | 19.7±3.8            | 18.4±4.2                | 0.008    | 19.5±3.8                 | 18.5±4.1                     | 0.069    |
| pre-2RISH (mm)                   | 20.8±5.1            | 19.8±5.3                | 0.110    | 20.6±4.9                 | 19.9±5.3                     | 0.325    |
| pre-3RISH (mm)                   | 21.1±4.4            | 19.7±4.6                | 0.015    | 20.8±4.3                 | 19.8±4.6                     | 0.110    |
| pre-4RISH (mm)                   | 20.1±4.9            | 18.9±3.8                | 0.010    | 20.1±5.2                 | 18.9±3.8                     | 0.031    |
| post-2LISH (mm)                  | 21.3±5.7            | 20.4±5.3                | 0.119    | 20.9±5.7                 | 20.4±5.3                     | 0.493    |
| post-3LISH (mm)                  | 19.8±4.7            | 18.9±4.5                | 0.076    | 19.7±4.7                 | 18.9±4.5                     | 0.219    |
| post-4LISH (mm)                  | 20.9±5.3            | 18.5±4.0                | <0.001   | 20.8±5.3                 | 18.6±4.0                     | <0.001   |
| post-2RISH (mm)                  | 22.2±5.5            | 21.5±5.9                | 0.337    | 22.3±5.5                 | 21.5±5.9                     | 0.354    |
| post-3RISH (mm)                  | 21.3±4.2            | 20.4±4.9                | 0.143    | 20.9±4.3                 | 20.5±4.8                     | 0.443    |
| post-4RISH (mm)                  | 21.3±5.7            | 18.7±4.1                | <0.001   | 20.7±5.6                 | 18.8±4.2                     | 0.001    |
| ipre-2LISH (mm/m <sup>2</sup> )  | 10.7±3.2            | 9.8±2.6                 | 0.007    | 10.7±3.4                 | 9.8±2.6                      | 0.009    |
| ipre-3LISH (mm/m <sup>2</sup> )  | 10.1±2.1            | 9.8±2.6                 | 0.281    | 10.0±2.2                 | 9.8±2.2                      | 0.610    |
| ipre-4LISH (mm/m <sup>2</sup> )  | 10.5±2.0            | 9.7±2.3                 | 0.002    | 10.4±2.1                 | 9.7±2.3                      | 0.037    |
| ipre-2RISH (mm/m <sup>2</sup> )  | 11.2±2.9            | 10.5±3.0                | 0.047    | 11.0±2.8                 | 10.5±3.0                     | 0.228    |
| ipre-3RISH (mm/m <sup>2</sup> )  | 11.3±2.5            | 10.4±2.6                | 0.003    | 11.1±2.6                 | 10.4±2.6                     | 0.048    |
| ipre-4RISH (mm/m <sup>2</sup> )  | 10.7±2.5            | 9.9±2.2                 | 0.003    | 10.7±2.7                 | 9.9±2.1                      | 0.021    |
| ipost-2LISH (mm/m <sup>2</sup> ) | 11.4±3.3            | 10.7±3.0                | 0.049    | 11.2±3.4                 | 10.7±3.0                     | 0.319    |
| ipost-3LISH (mm/m <sup>2</sup> ) | 10.7±2.8            | 9.9±2.5                 | 0.016    | 10.5±2.8                 | 9.9±2.5                      | 0.093    |
| ipost-4LISH (mm/m <sup>2</sup> ) | 11.2±2.9            | 9.8±2.2                 | <0.001   | 11.0±2.9                 | 9.8±2.3                      | <0.001   |
| ipost-2RISH (mm/m <sup>2</sup> ) | 11.9±3.2            | 11.4±3.4                | 0.178    | 11.9±3.2                 | 11.4±3.4                     | 0.253    |
| ipost-3RISH (mm/m <sup>2</sup> ) | 11.5±2.7            | 10.7±2.6                | 0.020    | 11.2±2.8                 | 10.8±2.6                     | 0.159    |
| ipost-4RISH (mm/m <sup>2</sup> ) | 11.3±3.0            | 9.8±2.2                 | 0.020    | 11.0±3.0                 | 9.9±2.3                      | <.001    |

ipost-2LISH: indexed 2<sup>nd</sup> left intercostal space height; ipost-3LISH: indexed 3<sup>rd</sup> left intercostal space height; ipost-4LISH: indexed 4<sup>th</sup> left intercostal space height; ipost-2RISH: indexed 2<sup>nd</sup> right intercostal space height; ipost-3RISH: indexed 3<sup>rd</sup> right intercostal space height; ipost-4RISH: indexed 4<sup>th</sup> right intercostal space height; ipre-2LISH: indexed 2<sup>nd</sup> left intercostal space height; ipre-3LISH: indexed 3<sup>rd</sup> left intercostal space height; ipre-4LISH: indexed 4<sup>th</sup> left intercostal space height; ipre-2RISH: indexed 2<sup>nd</sup> right intercostal space height; ipre-3RISH: indexed 3<sup>rd</sup> right intercostal space height; ipre-4RISH: indexed 4<sup>th</sup> right intercostal space height; post-2LISH: 2<sup>nd</sup> left intercostal space height; post-3LISH: 3<sup>rd</sup> left intercostal space height; post-4LISH: 4<sup>th</sup> left intercostal space height; post-2RISH: 2<sup>nd</sup> right intercostal space height; post-3RISH: 3<sup>rd</sup> right intercostal space height; post-4RISH: 4<sup>th</sup> right intercostal space height; pre-2LISH: 2<sup>nd</sup> left intercostal space height; pre-3LISH: 3<sup>rd</sup> left intercostal space height; pre-4LISH: 4<sup>th</sup> left intercostal space height; pre-2RISH: 2<sup>nd</sup> right intercostal space height; pre-3RISH: 3<sup>rd</sup> right intercostal space height; pre-4RISH: 4<sup>th</sup> right intercostal space height.
